# Supplementary material for: The clinical value of KL-6 for predicting the occurrence and severity of connective tissue disease-associated interstitial lung disease is not affected by CTD type or treatment
Source: PeerJ journal article supplement (doi:10.7717/peerj.17792), 2024-08-08
Supplement: raw_data.xlsx [file raw_data.xlsx]

## Sheet: Sheet1
疾病诊断（Group;1=ILD;0=no-ILD）	是否用药（Medication）	性别数字(Sex;male 1)	吸烟(Smoking)	住院时间(Hospital)	高血压(Hypertension)	糖尿病(Diabetes)	呼吸困难(Dyspnea)	咳嗽(cough)	BMI	年龄(Age)	NLR	SII	MLR	PLR	KL-6	白细胞 (WBC)	中性粒细胞数(Neu)	淋巴数(Lymph)	单核数(Mono)	红细胞分布宽度SD(RDW-SD)	红细胞分布宽度CV(RDW-CV)	血小板计数(PLT)	AST	ALT	白蛋白(Alb)	D-二聚体(D-Dimer)	ESR	CRP	FVC	FVC%	FEV1	FEV1%	DLCO	DLCO%	ANA	dsDNA	SSA	SSB	Scl-70	Ro52	Jo-1	CCP	RF
1	1	0	0	7	0	0	1	1	27.3437	46	2.79798	945.717	0.318182	170.707	886.78	8.21	5.54	1.98	0.63	51.7	14.9	338	14.3	11.12	37.98	24	12	3.34	1.96	65	1.73	67	4.57	56	0	0	0	0	0	1	0	0	0
1	1	0	0	6	0	0	1	0	20.9566	47	1.29231	254.585	0.230769	101.026	5499.54	5.11	2.52	1.95	0.45	49	14.8	197	24.77	26.69	42.25	28	40	3.34	1.8	63	1.37	56	3.23	41	1	0	0	0	1	0	0	0	0
1	1	1	1	7	1	1	0	0	26.7229	59	3.49662	898.632	0.503378	86.8243	1846.58	15.49	10.35	2.96	1.49	42.5	13.3	257	23.99	26.52	28.18	619	68	87.11	1.89	52	1.76	61	4.08	49	1	0	0	0	0	0	0	1	1
1	1	0	0	8	0	0	1	0		58	3.69903	580.748	0.368932	152.427	1469.42	5.28	3.81	1.03	0.38	56	16.9	157	7.73	20.26	32.22	487	73	26.72	1.92	74.5	1.34	61.5	2.33	31.9	1	0	1	0	1	1	0	1	0
1	1	0	0	7	0	0	1	1	27.9431	63	5.29703	1165.35	0.108911	217.822	4854.06	6.47	5.35	1.01	0.11	46.4	13.2	220	17.71	17.39	42.18	57	16	1.58	1.52	57	1.38	62	3.68	50	1	0	0	0	0	0	0	0	0
1	1	0	1	8	0	1	1	1	21.6311	66	4.27966	1091.31	0.144068	216.102	4224.5	6.4	5.05	1.18	0.17	51.4	15	255	42.18	23.25	31.35	227	38	4.99	3.26	85	2.57	87	5.39	62	0	0	0	0	0	0	0	0	0
1	1	0	0	9	0	0	1	1	20.83	59	2.1828	691.946	0.209677	170.43	3886.63	6.37	4.06	1.86	0.39	46.9	14.1	317	7	14.38	32.06		66	29.07	0.98	25	0.94	30	2.75	31	0	0	0	0	0	0	0	1	1
1	0	0	0	22	1	1	1	1	24.3418	58	7.49153	5026.81	0.581921	379.096	3297.38	17.47	13.26	1.77	1.03	43.8	14	671	11.78	20.19	38.17	361	60	11.3	1.53	57	1.42	63	5.11	69	1	0	0	0	0	1	0	0	0
1	0	0	0	6	1	1	1	1	25.5296	73	1.93827	325.63	0.339506	103.704	3283.23	5.54	3.14	1.62	0.55	42.2	12.2	168	15.19	23.61	38.04	162	24	3.34	1.69	76	1.5	82	3.3	50	0	0	0	0	0	0	0	0	0
1	0	1	1	22	1	1	1	0	22.0386	51	4.77348	2033.5	0.569061	235.359	3235.96	11.61	8.64	1.81	1.03	41.7	12.5	426	14.2	16.23	37.31	167	60	14.9	2.14	58	1.69	56			1	0	1	0	0	1	0	0	0
1	1	0	0	15	1	0	1	1		81	5.04396	1260.99	0.417582	274.725	2579.93	6.12	4.59	0.91	0.38	48.5	14.5	250	39.83	57.08	31.5	885	62	73.02	2.38	60	2.05	64	3.71	41	1	0	0	0	0	0	0	0	1
1	0	1	1	10	0	0	1	1	23.0518	72	5.08081	701.152	0.757576	139.394	2296.7	7.14	5.03	0.99	0.75	49	15.2	138	33.15	46.87	31.87	4055	18	7.9	3.24	134	2.49	124	2.49	36	1	0	0	0	0	0	0	0	1
1	0	0	0	11	0	0	1	1	24.2568	51	1.81215	494.718	0.232044	150.829	1994.84	5.6	3.28	1.81	0.42	43.2	12.6	273	13.92	31.33	33.44	337	40	7.54	2.36	115	1.99	116	3.89	62	1	0	0	0	0	1	0	0	0
1	0	1	1	16	1	0	1	1		70	8.95	1387.25	0.3625	193.75	1909.53	8.4	7.16	0.8	0.29	45.8	13.4	155	22.06	25.31	29.01	310	46	145.26	2.34	57	2.01	61	4.17	44	0	0	0	0	0	0	0	1	1
1	0	1	1	16	0	0	1	1		81	2.80132	479.026	0.324503	113.245	1902.17	6.55	4.23	1.51	0.49	51.2	15	171	23.17	30.37	38.38	568	14	2.92	2	70	1.77	84			1	0	0	0	0	0	0	0	0
1	1	0	0	22	1	0	1	1		58	7.62308	1318.79	0.4	133.077	1702.53	11.77	9.91	1.3	0.52	52.6	15.9	173	23.98	16.94	30.29	1064	30	83.1	2.34	75	1.77	75			0	0	0	0	0	1	0	1	1
1	0	0	0	12	0	0	0	1		61	6.38346	2195.91	0.466165	258.647	1678.51	10.62	8.49	1.33	0.62	56.9	15.1	344	47.07	52.7	34.51	1120	44	5.76	1.68	73	1.47	76	2.05	30	1	0	0	0	0	0	0	0	0
1	0	0	0	14	1	1	1	1	19.2277	54	1.3384	191.392	0.277567	54.3726	1533.07	6.98	3.52	2.63	0.73	48	13.5	143	16.68	18.29	38.48	204		3.69	2.43	103	2.1	106	4.63	67	0	0	0	0	0	0	0	1	1
1	0	1	1	5	0	0	1	0	22.9819	68	7.39	1640.58	0.88	222	1529.08	9.53	7.39	1	0.88	45.3	14.4	222	17.72	25.12	30.62	4265	18	85	2.09	105	1.77	109	3.04	49	1	0	0	0	0	0	1	0	0
1	1	0	0	19	0	0	1	0		50	17.28	3732.48	0.973333	288	1524.79	14.52	12.96	0.75	0.73	48.4	17.8	216	15.94	22.42	33.7	228	50	28.27	2.62	64.5	2.37	73.3			1	0	0	0	0	1	0	0	1
1	1	1	0	8	0	0	0	0	23.0469	65	2.61224	394.449	0.442177	102.721	1442.78	6.32	3.84	1.47	0.65	47.7	14	151	36.07	34.84	38.65	146	20	3.3	2.68	74	2.07	73	4.59	55	1	0	0	0	0	1	1	0	0
1	1	0	0	14	1	0	1	0	22.8329	65	3.20652	808.043	1.09783	273.913	1281.28	4.94	2.95	0.92	1.01	51.1	13.6	252	10.22	23.66	33.86		52	11.2	1.98	85	1.62	83	2.49	36	1	0	0	0	0	1	0	0	1
1	0	0	0	12	0	0	1	0	20.9321	50	3.40367	1164.06	0.40367	313.761	1276.61	5.27	3.71	1.09	0.44	48	16.8	342	20.34	21.22	36.8	80	28	6.84	2.17	85	2.15	69	2.47	34	1	0	0	0	0	0	0	1	1
1	0	0	0	9	0	0	1	1	28.5156	65	1.78723	325.277	0.287234	193.617	1261.82	2.94	1.68	0.94	0.27	44.2	12.7	182	7.68	26.05	35.14	2121	38	12.2	2.08	83	1.6	76	4.6	64	1	0	0	0	0	0	0	1	0
1	0	0	0	9	0	0	1	1	26.6667	69	2.04717	286.604	0.207547	132.075	1261.82	3.66	2.17	1.06	0.22	43.2	12.8	140	17.59	19.37	37.52	225	5	1.38	2.9	80	2.43	85	4.52	54	1	0	0	0	0	0	0	0	0
1	0	1	0	15	0	0	1	1	23.8751	58	7.71429	1087.71	0.642857	335.714	1205.44	3.96	3.24	0.42	0.27	43.4	13.2	141	18.23	32.15	33.63	512	26	3.6	3.1	88	2.45	86	5.8	70	1	0	0	0	0	1	0	0	0
1	0	0	0	13	0	0	1	1	22.2656	45	3.13043	1324.17	0.288043	229.891	1198.36	8.35	5.76	1.84	0.53	46.6	14.5	423	20.32	22.89	42.24	77	24	1.19	2	71	1.63	68	3.56	46	1	0	0	0	1	0	0	0	1
1	1	1	0	12	0	0	1	1	26.1752	59	1.37419	254.226	0.212903	59.6774	1112.62	8.17	4.26	3.1	0.66	53.3	14.1	185	42.88	23.5	35.89	161	4	3.3	1.96	66	1.86	83	4.29	63	0	0	0	0	0	0	1	0	1
1	1	0	0	4	0	0	1	0	25.5937	55	2.68261	536.522	0.369565	86.9565	1093.37	9.35	6.17	2.3	0.85	49.4	13.3	200	23.66	17.46		60	16	5	1.91	69	1.58	67	4.02	53	1	0	1	0	1	0	0	0	0
1	1	0	0	15	0	0	1	1	27.1918	49	3.75362	1336.29	0.485507	257.971	1003.28	7.35	5.18	1.38	0.67	45.7	13.5	356	13.38	24.17	33.48	258	30	10.8	1.34	56	1.14	56	3.29	47	1	0	0	0	0	1	0	0	1
1	0	0	0	11	0	0	1	1	17.1875	57	2.41509	623.094	0.176101	162.264	973.65	5.81	3.84	1.59	0.28	52	16	258	22.77	50.94	27.17	270	60	8.84	2.04	73	1.86	81	4.01	53	1	0	0	0	0	1	0	0	1
1	0	0	0	8	0	0	0	1	20.9042	74	2.13295	684.676	0.208092	185.549	962.07	6.09	3.69	1.73	0.36	49.9	14.1	321	9.42	18.97	32.6	383	60	5.81	1.54	61	1.21	57	2.98	41	1	0	0	0	0	0	0	1	1
1	1	1	0	7	0	0	0	0	42.9383	32	4.86076	908.962	0.721519	118.354	920.42	10.78	7.68	1.58	1.14	45	14	187	30.93	28.46	36.32	415	10	14.5	3.05	64	2.47	62	7.98	73	1	0	0	0	0	1	1	0	0
1	1	0	0	7	0	0	1	1	20.9572	62	4.38542	855.156	0.447917	203.125	909.52	5.83	4.21	0.96	0.43	45	13.6	195	19.83	21.25	36.24	325	64	16.35	2.99	82	2.33	81	3.03	36	1	0	1	0	0	1	0	0	1
1	0	0	0	8	0	0	1	1	21.3382	81	2.89024	601.171	0.384146	126.829	865.6	7.34	4.74	1.64	0.63	45.7	13.6	208	7.83	17.09	36.23	162	38	3.34	4.02	89	3.28	89	8.5	82	0	0	0	0	0	0	0	1	1
1	0	1	0	10	0	0	1	1	20.7031	72	9.11392	3472.41	0.56962	482.278	855.39	8.61	7.2	0.79	0.45	51.2	13.6	381	57.36	38.79	31.03	1628	56	15.19	2.2	76	1.98	89	2.57	38	1	0	0	0	0	0	0	0	0
1	1	0	0	14	1	1	0	0	22.8928	62	5.30769	1863	0.646154	540	851.13	4.7	3.45	0.65	0.42	46.3	14.5	351	17.34	28.46	36.97	782	40	11.9	2.19	164	1.44	142	1.6	32	1	0	1	0	1	0	0	1	1
1	1	1	0	11	1	0	1	1		74	9.16883	1962.13	0.207792	277.922	840.02	8.08	7.06	0.77	0.16	46.3	12.6	214	10.36	21.21	29.77			137.29	2.63	77	2.35	90	4.29	55	0	0	0	0	0	0	0	0	1
1	1	1	0	20	0	0	1	0	21.2585	64	5.61878	2343.03	0.535912	230.387	796.99	13	10.17	1.81	0.97	58.1	17.2	417	123.79	67.33	37.72	2640	62	59	2.72	77	1.63	61	3.76	47	1	0	0	0	0	0	0	1	1
1	1	0	0	18	0	0	1	1	22.6003	70	3.17895	874.211	0.226316	144.737	740.26	8.4	6.04	1.9	0.43	41.5	12.5	275	9.62	19.97	39.97	87	15	3.3	1.9	88	1.59	90	3.97	61	0	0	0	0	0	0	0	0	1
1	1	0	0	13	0	0	1	0	21.9899	71	8.2561	677	0.97561	100	696.86	8.5	6.77	0.82	0.8	74.6	17.3	82	16.65	21.87	32.19		80	54.8	3.04	91	2.41	92	6.49	84	0	0	0	0	0	0	0	1	1
1	1	1	1	34	1	1	0	1		71	3.07004	749.089	0.330739	94.9416	618.34	11.63	7.89	2.57	0.85	44.4	14.2	244	17.48	56.72	17.35	1013	55	133.05	1.73	65	1.43	63	3.62	48	0	0	0	0	0	1	0	1	1
1	1	0	0	19	0	0	0	0		78	6.87234	1381.34	0.404255	213.83	592.65	7.93	6.46	0.94	0.38	50.6	14.5	201	7.75	22	29.18	937	40	107	1.55	50	1.18	48	2.47	34	0	0	0	0	0	0	0	0	1
1	1	0	0	17	0	0	0	0		89	56.1071	12848.5	0.857143	817.857	562.09	16.23	15.71	0.28	0.24	50.4	14.1	229	29.62	39.26	24.15	918	30	78.82	2.53	70	2.02	70	5.98	71	1	0	0	0	0	0	0	0	0
1	1	0	0	6	0	0	1	0	20.4444	11	1.15466	318.686	0.148305	58.4746	502.85	10.9	5.45	4.72	0.7	49.1	13.8	276	20.73	18.74	43.84	21	7	0.21	2.16	84	1.89	86	4.73	71	1	0	0	0	0	1	0	1	0
1	0	1	0	7	0	0	0	1		58	11.3922	398.725	0.627451	68.6275	432.68	6.65	5.81	0.51	0.32	102.2	28.8	35	15.01	28.69	19.37			13.81	2.25	69	2.05	83	6.38	85	1	0	0	0	0	0	0	0	0
1	0	0	0	8	1	0	0	1		78	7.43956	2708	0.538462	400	431.7	8.18	6.77	0.91	0.49	43.4	12.6	364	23.34	32.85	28.61	989	75	33.07	2.59	110	1.92	98	3.85	56	0	0	0	0	0	0	0	0	1
1	1	0	0	13	0	0	0	0	22.2222	47	3.85143	658.594	0.16	97.7143	419.03	8.79	6.74	1.75	0.28	44.4	13.1	171	19.11	12.76	36.28	515	16	24.3	2.65	96	2.14	91	4.21	55	1	0	1	1	0	0	0	0	0
1	0	0	0	4	1	1	0	0	19.5312	69	1.47099	314.792	0.368601	73.0375	238.05	8.36	4.31	2.93	1.08	48.3	13.3	214	7.58	13.45	29.72	678		1.1	2.47	108	1.95	101	5.7	84	0	0	0	0	0	1	0	0	0
1	0	0	0	10	1	1	0	1	28.578	71	1.19437	263.957	0.130435	56.5217	138.32	9.28	4.67	3.91	0.51	46.6	13.2	221	10.63	14.82	39.72	68	8	3.34	2.18	93	1.74	89	5.01	73	1	0	0	0	0	0	0	0	0
1	1	0	0	5	0	0	0	1	24.093	49	2.22857	425.657	0.271429	136.429	138.32	4.99	3.12	1.4	0.38	41.2	12.4	191	22.09	20.27	43.89	54	4	3.34	3.39	109	2.78	105	6.38	77	1	0	0	0	1	0	0	0	0
1	1	1	1	8	0	1	1	1		71	2.64885	331.107	0.221374	95.4198	532.15	5.2	3.47	1.31	0.29	57.7	18.5	125	44.15	31.98	30.76	323	2	15.6	1.29	75	1.18	83	3.26	57	0	0	1	0	0	0	0	1	1
1	0	0	0	12	0	0	1	1	22.6003	29	1.4186	348.977	0.169435	81.7276	1107.82	7.83	4.27	3.01	0.51	45.3	14.9	246	9.1	24.31	17.71	2037	68	7.39	2.16	69	1.9	70	4.08	49	1	0	1	0	0	1	0	1	1
1	1	0	0	14	1	0	0	0	28.251	63	2.35573	727.921	0.237154	122.134	462.68	9.36	5.96	2.53	0.6	44.3	13.8	309	11.08	16.39	39.35	39	14	0.22	1.82	79	1.53	80	3.4	50	1	0	0	0	1	0	0	0	0
1	1	1	0	19	0	0	0	0	20.148	58	4.05028	1271.79	0.268156	175.419	261.47	9.65	7.25	1.79	0.48	49.8	15.2	314	10.65	12.55	31.26	843	80	114.77	3.34	82	2.97	91	5.67	61	0	0	0	0	0	0	0	1	1
1	0	0	0	15	1	0	0	0	24.8889	59	1.45455	170.182	0.469697	177.273	663.7	1.97	0.96	0.66	0.31	47.1	13.2	117	80.29	113.69	34.22		58	0.35	2.75	75	1.89	68	4.58	55	1	1	0	0	0	0	0	0	1
1	1	1	0	9	1	0	0	0	15.9597	66	0.855895	179.738	0.161572	91.7031	877.47	4.97	1.96	2.29	0.37	63.3	15.9	210	11.96	22.43	28.78		55	3.5	2.3	56	2.27	71	3.57	38	1	0	0	0	0	0	0	1	1
1	1	0	0	28	0	0	1	1		75	13.0541	4647.24	0.527027	481.081	2479.98	10.79	9.66	0.74	0.39	50.3	14	356	53.79	34	32.68	1201	46	22.96	1.23	65	1.1	73			0	0	0	0	0	0	0	1	1
1	0	1	1	15	1	0	1	1		82	5.91429	650.571	0.52381	104.762	956.26	7.82	6.21	1.05	0.55	47.1	13.4	110	115.16	43.45	32.98	392	9	20.5	1.46	37	1.32	42			1	0	0	0	0	1	0	0	1
1	0	1	0	14	0	0	0	1	22.8329	69	3.5814	537.209	0.0232558	174.419	1588.99	3.99	3.08	0.86	0.02	51.4	16.4	150	9.52	15.98	32.98		82	70.6	2.72	88	2.2	92	3.26	45	0	0	0	0	0	0	0	0	1
1	0	1	1	12	0	0	1	1	20.6174	69	8.76471	2454.12	1.06863	274.51	1123.02	11.24	8.94	1.02	1.09	40.2	12.9	280	30.69	25.87	25.48	572	78	71.7	2.58	76	2.33	91	2.78	36	1	0	0	0	0	0	0	0	1
1	0	0	0	12	0	0	1	1		62	3.352	724.032	0.48	172.8	1877.37	6.19	4.19	1.25	0.6	47.7	13.7	216	71.47	52.85	43.44	209	14	4.44	1.99	70	1.12	53	2.35	36	1	0	0	0	0	1	0	0	1
1	0	0	0	16	0	0	0	0	22.5896	63	2.39091	729.227	0.668182	138.636	719.07	9.24	5.26	2.2	1.47	51.1	15.4	305	118.12	161.26	34.49	461	20	3.22	3.31	94	2.52	92	5.94	74	1	0	1	0	0	1	0	0	1
1	0	1	1	12	0	0	1	0	25.8264	48	2.22277	662.386	0.316832	147.525	885.09	7.44	4.49	2.02	0.64	45	13.2	298	39.77	39.57	36.4		12	13.1	2.56	59	2.13	60	6.61	66	0	0	0	0	0	1	1	0	0
1	1	1	1	9	0	0	1	1	21.048	60	4.37681	630.261	0.405797	208.696	1624.38	4.06	3.02	0.69	0.28	50.9	13.3	144	21.82	23.11	43.07	157	46	3.44	2.48	72	1.95	71	3.25	41	1	0	1	0	0	1	0	0	1
1	0	1	1	11	1	0	1	0	26.0375	75	1.11111	323.333	0.126437	111.494	576.02	6.05	2.9	2.61	0.33	55.3	15.9	291	6.26	12.58	31.52	107	58	3.05	3.4	93	2.98	107	4.93	60	1	0	0	0	0	0	0	0	0
1	1	0	0	7	1	0	0	0	23.03	66	2.08088	518.14	0.25	183.088	357.96	4.69	2.83	1.36	0.34	42.8	12.6	249	21.91	28.67	46.19		54	1.19	2.66	98	2.05	91	5.11	68	1	0	0	0	0	0	0	1	1
1	0	0	0	11	0	1	0	0		77	4.26203	1466.14	0.529412	183.957	713.75	11.15	7.97	1.87	0.99	38.3	12.7	344	16.69	17.82	34.59		50	3.86	2.16	126	1.62	119	3.1	55	1	0	0	0	0	0	0	1	1
1	0	1	1	8	0	0	0	0	25.9516	58	1.68966	371.724	0.203448	75.8621	791.8	8.52	4.9	2.9	0.59	43.7	12.9	220	35.21	30.55	38.76	57	14	3.22	4.28	106	3.11	100	8.35	94	0	0	0	0	0	0	0	1	1
1	0	0	0	11	0	0	0	0		77	0.801802	190.027	0.225225	106.757	132.11	4.65	1.78	2.22	0.5	48.1	13.4	237	4.73	13.37	31.59	601	18	3.34	4.39	112	3.26	108	6.85	78	1	0	0	0	0	0	0	0	0
1	0	1	1	9	0	0	1	0	26.1157	70	12.25	379.75	1.01471	45.5882	333.66	9.85	8.33	0.68	0.69	54.4	15.1	31	29.18	20.02	32.08	1090	22	20.52	4.3	96	2.89	79	8.03	79	1	0	0	0	0	0	0	0	0
1	1	0	0	8	1	0	0	0	29.3413	31	3.95726	597.547	0.307692	129.06	291.85	6.18	4.63	1.17	0.36	70.5	17.6	151	25.89	30.9	38.32	641	60	19.64	4.31	93	3.07	86	8.81	87	0	0	0	0	0	0	0	1	0
1	1	0	0	9	1	0	0	0	28.0404	72	6.12903	845.806	0.354839	222.581	237.03	4.65	3.8	0.62	0.22	78.1	21.9	138	10.67	16.26	27.86	984		12.33	2.87	116	2.13	123	3.45	61	1	0	0	0	0	1	0	0	1
1	1	0	0	6	0	0	0	0		72	14.8615	5038.06	2.16923	521.538	230.91	11.85	9.66	0.65	1.41	49	16.6	339	24.49	103.94	28.07	2778	52		3.72	102	2.64	99			0	0	0	0	0	0	0	1	1
1	1	1	0	5	0	0	0	1		63	0.774691	184.377	0.138889	73.4568	246.21	6.37	2.51	3.24	0.45	58.7	13.9	238	15.55	16.69	27.28	189	68	24.4	3.66	108	2.68	100	7.22	92	0	0	0	0	0	0	0	0	0
1	1	1	1	8	1	0	0	0	23.8754	61	2.11538	440	0.490385	200	406.32	3.8	2.2	1.04	0.51	49.6	13.4	208	17.74	29.63	39.28	106	24	6.75	4.62	121	3.28	109	5.93	68	1	0	0	0	0	0	0	1	1
1	1	0	0	12	1	0	0	0		64	10.5342	2412.34	0.616438	313.699	177.56	8.9	7.69	0.73	0.45	48.4	15.1	229	19.37	16.67	30.95	775	46	49.2	3.52	133	2.66	140			1	1	1	1	1	1	0	0	0
1	1	1	0	6	0	0	0	0	21.3578	78	3.7619	1057.1	0.517007	191.156	318.02	7.88	5.53	1.47	0.76	52.4	15.6	281	11.22	17.85	33	1101	46	31	3.16	105	2.28	102	5.2	75	0	0	0	0	0	0	0	1	1
1	1	1	0	10	0	0	0	0	24.858	67	2.59223	487.34	0.485437	182.524	267.56	4.23	2.67	1.03	0.5	51.9	13.2	188	44.71	60.12	38.07	58	12	0.2	3.63	91	2.67	87	9.65	107	1	0	1	1	0	1	0	0	0
1	0	0	0	12	0	0	0	0	24.8777	55	1.49618	311.206	0.167939	158.779	256.39	3.53	1.96	1.31	0.22	47.4	13.8	208	20.47	23.18	31.32	321	82	0.75	2.52	108	1.87	97	7.6	111	1	0	1	0	0	1	0	0	1
1	1	0	0	8	1	1	1	0	20.1348	58	6.29412	270.647	0.735294	126.471	212.49	2.78	2.14	0.34	0.25	54.8	16.2	43	12.66	13.32	31.82	435	14	3.3	1.09	66	0.91	70	2.75	50	1	0	1	0	0	0	0	0	0
1	0	1	0	11	1	0	0	0	26.7299	61	1.70968	239.355	0.232258	90.3226	176.53	4.78	2.65	1.55	0.36	42.6	12.3	140	26.93	30.8	31.39	57	8	3.22	3.5	92	2.65	88	10.27	118	0	0	0	0	0	0	0	0	0
1	0	0	0	4	1	1	0	0	25.8065	74	3.82581	1415.55	0.554839	238.71	202.23	8.47	5.93	1.55	0.86	49.1	14.6	370	12.14	14.11	37.77	2355	70	63.1	2.74	136	2.04	125	4.65	73	0	0	0	0	0	0	0	1	1
1	0	0	0	6	0	0	0	0	24.974	79	2.10651	303.337	0.272189	85.2071	445.29	5.77	3.56	1.69	0.46	62.5	16	144	15.52	22.9	36.73	122	28	12.2	1.53	80	1.16	76	3.38	56	1	0	0	0	0	1	0	0	0
1	0	0	0	10	0	1	0	0	25.4767	62	1.40645	210.968	0.2	96.7742	290.84	4.12	2.18	1.55	0.31	50.1	13.2	150	14.62	16.96	44.18	190	58	3.22	2.16	108	2	106	5.34	79	1	0	1	1	0	1	0	0	1
0	0	1	1	11	1	0	1	0		79	5.28125	1394.25	0.1875	412.5	305.96	4.14	3.38	0.64	0.12	40.1	13.2	264	13.87	20.41	29.74	699	70	49.43							0	0	0	0	0	1	0	0	0
0	0	0	0	8	0	0	1	0	23.0469	59	1.09548	266.201	0.211055	122.111	192.99	4.66	2.18	1.99	0.42	42.9	12.6	243	13.27	15.18	39.95	42	8	3.3							1	0	0	0	0	0	0	0	0
0	1	1	1	17	0	0	1	1	16.9467	65	26.7037	4593.04	0.518519	637.037	142.46	7.72	7.21	0.27	0.14	50.2	14.8	172	26.42	50.95	20.74	1742	84	114.17							1	0	0	0	0	0	0	1	1
0	1	1	1	12	0	0	0	1	18.0662	81	5.52381	1524.57	0.657143	262.857	264.51	11.22	5.8	1.05	0.69	47.7	13.7	276	9.36	12.63	30.02	1984	6	18.7							1	0	1	0	0	1	0	1	0
0	0	0	0	12	1	0	0	0	19.8413	45	1.98246	404.421	0.438596	357.895	544.35	1.99	1.13	0.57	0.25	41.2	11.9	204	35.87	30.85	36.64	80		1.08							1	0	1	0	0	1	0	0	1
0	0	0	1	21	0	0	0	0	29.0487	56	2.66667	781.333	0.319444	406.944	464.6	2.87	1.92	0.72	0.23	43.5	12.8	293	28.66	45.88	15.61	715	68	6.72							1	0	1	0	0	0	0	0	0
0	1	0	0	14	0	0	0	0	21.4844	36	3.97368	731.158	0.201754	161.404	420.01	5.92	4.53	1.14	0.23	45.9	13.1	184	12.4	15.98	13.09	270	60	3.75							1	0	1	0	0	1	0	0	0
0	1	1	0	23	1	0	0	0	22.8928	71	6.76471	196.176	0.607843	56.8627	323.03	4.3	3.45	0.51	0.31	43	13.3	29	35.75	25.84	35.29		8	3.34							1	0	0	0	0	0	0	0	1
0	1	0	0	12	0	0	0	0		55	4.14516	878.774	0.677419	170.968	320.02	7.24	5.14	1.24	0.84	40.4	12.7	212	41.32	67.55	40.79	350	38	93.9							0	0	0	0	0	0	0	1	1
0	0	0	0	21	0	0	0	1	17.0656	11	4.02752	845.78	0.302752	192.661	309.98	5.88	4.39	1.09	0.33	43.6	13.4	210	84.27	175.01	31.57	548	72	3.54							1	1	1	1	0	1	0	0	0
0	1	0	0	2	0	0	0	0		43	7.625	38.125	0.642857	8.92857	293.87	5.19	4.27	0.56	0.36	97.6	23.5	5	49.14	58.58	30.13	3630		7.55							1	0	0	0	0	0	0	0	1
0	1	0	1	7	1	0	0	0	26.8386	65	3.26549	744.531	0.504425	201.77	290.84	5.52	3.69	1.13	0.57	52.3	14.5	228	11.93	16.88	33.87	412	64	58.96							1	0	1	0	0	1	0	1	1
0	1	0	0	8	1	0	0	0	37.5	16	4.97931	1015.78	0.503448	140.69	286.8	9.45	7.22	1.45	0.73	50.7	15.4	204	15.14	16.4	20.92	437	10	1.83							1	1	1	0	0	0	0	0	0
0	1	0	0	8	0	0	0	0	27.4348	24	2.05046	543.372	0.302752	121.56	276.68	7.36	4.47	2.18	0.66	44.8	13.8	265	9.1	10.54	18.62	757	13	3.3							1	0	1	0	0	0	0	0	0
0	0	0	0	10	0	0	0	0	14.881	29	4.44231	1617	0.211538	700	255.37	2.94	2.31	0.52	0.11	44.6	14.8	364	24.26	75.95	23.56	2052	88	18.2							1	1	1	1	0	1	0	1	0
0	1	0	0	6	0	0	0	0	20.3954	57	1.45699	412.328	0.22043	152.151	253.34	5.14	2.71	1.86	0.41	46.1	12.6	283	14.45	22.22	40.58	250	30	1.62							1	0	1	1	0	1	0	0	0
0	0	0	0	19	1	0	0	0	16.225	17	1.27273	170.545	0.151515	203.03	249.26	1.62	0.84	0.66	0.1	49.4	15.6	134	26.49	21.32	28.14	355	54	3.34							1	1	1	0	0	1	0	0	1
0	0	0	0	7	0	0	0	0	24.0055	64	3.12791	509.849	0.383721	189.535	242.13	3.97	2.69	0.86	0.33	42.2	12.7	163	12.44	20.37	34.87	45	16								1	1	1	1	0	1	0	0	0
0	1	0	0	12	1	0	0	0	31.0447	56	1.38889	358.333	0.246914	159.259	236.01	4.4	2.25	1.62	0.4	47.6	14	258	56.56	42.15	37.12	153	32	3.34							1	1	0	0	0	0	0	0	0
0	0	0	0	8	1	0	0	0	26.8977	74	1.40164	217.254	0.327869	127.049	233.97	3.76	1.71	1.22	0.4	52.2	15.9	155	52.47	119.62	31.53	555	48	4.33							1	0	0	0	0	1	0	0	1
0	1	0	0	6	0	0	0	0	24.974	37	5.40385	1437.42	0.557692	511.538	217.61	3.64	2.81	0.52	0.29	47.5	13.5	266	21.16	27.65	38	22	23	1.52							1	1	0	0	0	0	0	0	0
0	1	0	0	13	0	0	0	0	23.1111	31	9.94737	1770.63	0.263158	468.421	215.56	4.26	3.78	0.38	0.1	39.5	13.3	178	58.16	48.25	32.2	403	80	83.86							1	1	0	0	0	0	0	0	0
0	1	0	0	6	0	0	0	0	25.1486	32	4.88462	923.192	0.179487	242.308	215.56	4.73	3.81	0.78	0.14	42.9	13.2	189	22.03	15.97	31.77		56	27.9							1	0	1	0	0	0	0	0	1
0	1	0	0	7	0	0	0	0	19.9481	34	1.96212	472.871	0.219697	182.576	209.42	4.25	2.59	1.32	0.29	42.7	12.6	241	24.22	17.58	44.44		8	0.47							1	0	1	0	0	1	0	0	0
0	0	0	0	4	0	0	0	0	18.3768	21	0.744681	153.404	0.205674	146.099	206.34	2.86	1.05	1.41	0.29	41.2	12.6	206	9.99	17.3	38.78	28									1	0	1	0	0	1	0	0	1
0	1	1	0	6	1	0	0	0	33.3465	64	3.38393	741.08	0.392857	195.536	206.34	5.53	3.79	1.12	0.44	42.5	13	219	10.23	12.92	38.51	135	5	3.3							1	0	0	0	0	1	0	0	0
0	1	0	0	17	0	0	0	1	19.563	58	1.51724	31.8621	0.62069	24.1379	204.29	2.77	1.32	0.87	0.54	47.8	13.2	21	35.25	43.47	33.74	236	40	15.6							1	0	1	0	0	1	0	0	1
0	1	0	0	17	0	0	0	0	20.0288	29	1.49587	281.223	0.330579	155.372	204.29	3.44	1.81	1.21	0.4	47.8	14	188	18.22	29.98	38.8	205	22	3.22							1	0	1	1	0	1	0	0	1
0	0	0	0	40	0	0	0	0	25.8876	39	3.3301	549.466	0.485437	160.194	202.23	5.05	3.43	1.03	0.5	43.5	14.3	165	134.99	207.05	30.44	205	26	3.34							1	1	1	0	0	1	0	0	0
0	0	0	0	20	1	0	0	0	22.151	56	1.03004	291.502	0.218884	121.459	200.18	5.53	2.4	2.33	0.51	41.7	12	283	21.72	17.92	42.15		10								0	0	0	0	0	0	0	0	1
0	0	0	0	15	1	0	0	0	29.7442	56	0.582278	120.532	0.259494	131.013	194.02	3.05	0.92	1.58	0.41	46.2	13.7	207	22.88	27.67	36.07		58	3.34							1	0	1	1	0	1	0	0	1
0	1	1	1	3	0	0	0	0		74	5.69536	1611.79	0.125828	187.417	192.99	10.31	8.6	1.51	0.19	47.5	14.3	283	13.85	20.96	27.31	592	70	135.35							0	0	0	0	0	0	0	0	1
0	0	1	0	10	0	0	0	0	22.9481	55	1.45638	202.436	0.355705	93.2886	190.93	4.26	2.17	1.49	0.53	42	12.1	139	25.77	30.41	38.74		18	3.3							1	0	1	1	0	1	0	0	1
0	1	0	0	8	1	0	0	0	23.3091	32	1.77741	319.934	0.242525	59.8007	190.93	9.12	5.35	3.01	0.73	66.7	24.2	180	5.38	11.35	31.82		4	0.41							1	1	1	1	0	1	0	1	1
0	1	0	0	6	0	1	0	0	19.6283	69	10.5625	1774.5	0.90625	525	188.88	4.05	3.38	0.32	0.29	50.2	13.5	168	29.89	32.88	36.69		18	3.34							1	0	0	0	0	1	0	0	0
0	0	0	0	6	0	0	0	0	20.3223	23	1.35172	258.179	0.275862	131.724	183.73	3.88	1.96	1.45	0.4	43.4	12.7	191	12.44	20.58	37.82	54	60	3.3							1	0	1	1	0	1	0	0	1
0	0	0	0	15	1	0	1	0	22.3757	45	0.971014	65.058	0.130435	48.5507	164.15	2.92	1.34	1.38	0.18	44.6	15	67	20.47	24.26	36.57	415	30	3.2							1	0	1	1	0	1	0	0	1
0	0	0	0	11	1	1	0	0	21.875	52	3.375	388.125	0.3375	143.75	163.12	3.91	2.7	0.8	0.27	45.7	14.3	115	29.42	27.54	28.48	319	24	0.49							1	1	0	0	0	0	0	0	0
0	0	0	0	19	0	0	0	1		16	0.84507	32.1127	0.0915493	26.7606	163.12	2.75	1.2	1.42	0.13	41.4	16.5	38	16.81	25.33	22.67	10000	90	11							1	1	1	0	0	0	0	1	0
0	0	0	0	6	1	1	0	0	25.2174	47	2.50314	523.157	0.163522	131.447	161.06	6.01	3.98	1.59	0.26	37.5	11.8	209	20.81	17.49	38.72	3368	60	46.65							1	0	1	0	0	1	0	0	1
0	0	1	0	7	0	0	0	0	29.5369	28	1	184	0.181373	90.1961	158.99	4.54	2.04	2.04	0.37	41.3	12.7	184	122.23	74.49	44.13	33	4	1.24							1	0	1	1	0	1	0	0	1
0	0	1	1	10	0	0	0	0	26.3656	57	2.06278	569.327	0.26009	123.767	157.96	7.63	4.6	2.23	0.58	39	12.2	276	16.08	13.86	39.47	747	36	17.5							0	0	0	0	0	0	0	1	1
0	0	0	0	8	0	0	0	0	22.8625	65	1.87069	338.595	0.267241	156.034	156.93	3.65	2.17	1.16	0.31	46.4	13.4	181	81.24	68.12	40.88	61	26	1.42							1	0	1	0	0	1	0	0	1
0	0	0	0	10	0	0	0	0		46	2.66667	1176	0.217687	300	156.93	5.79	3.92	1.47	0.32	43.6	12.8	441	20.31	27.52	29.86	997	70	113							1	0	0	0	0	0	0	1	1
0	1	0	0	5	0	0	0	0	27.1816	32	5.12987	1097.79	0.441558	277.922	155.9	5.09	3.95	0.77	0.34	43.8	14.3	214	11.42	10.81	27.29	261	22	3.34							1	0	0	0	0	0	0	0	0
0	0	0	0	9	0	0	0	0	21.9363	47	1.24581	125.827	0.156425	56.4246	154.86	4.26	2.23	1.79	0.28	46.4	12.9	101	36.29	39.04	33.15	21	14	0.92							1	0	1	0	0	1	0	1	1
0	1	0	0	7	0	0	0	0	24.3865	53	1.46457	391.039	0.259843	210.236	154.86	3.53	1.86	1.27	0.33	40.5	12.4	267	24.86	25.77	40	76	16	3.34							1	0	0	0	0	1	0	1	1
0	1	1	0	16	0	0	0	0	19.3698	21	1.09202	219.497	0.226994	123.313	152.8	3.92	1.78	1.63	0.37	44.4	13.3	201	15.3	21.76	36.65	168	15	6.73							1	1	0	0	0	0	0	0	0
0	1	0	0	8	1	1	0	0	21.0828	73	2.31081	330.446	0.189189	193.243	151.76	2.66	1.71	0.74	0.14	50.3	14.4	143	15.39	23.97	34.07	776	30	32.7							1	0	0	0	0	0	0	0	1
0	1	0	0	23	0	0	0	0	19.4771	38	2.43523	801.192	0.19171	170.466	151.76	7.09	4.7	1.93	0.37	43.1	12.6	329	27.06	21.08		149		3.34							1	0	1	0	0	1	0	0	0
0	0	0	0	12	1	0	0	0	21.9076	60	1.98319	293.513	0.277311	124.37	148.66	3.95	2.36	1.19	0.33	44.3	13.7	148	46.95	95.35	37.69	144	30	3.45							1	0	0	0	0	0	0	1	1
0	1	0	0	7	1	1	0	0	26.4463	54	3.44248	808.982	0.389381	207.965	146.59	5.74	3.89	1.13	0.44	41.5	12.4	235	10.38	14.01	35.47		30	9.9							0	0	0	0	0	0	0	1	1
0	1	0	0	7	1	0	0	0		65	2.91089	753.921	0.425743	256.436	143.49	4.48	2.94	1.01	0.43	50.5	14.7	259	9.81	11.7	33.28	492	60	20.38							1	0	0	0	0	0	0	1	1
0	1	0	0	9	0	0	0	0	30.0433	61	2.86555	495.739	0.310924	145.378	142.46	5.11	3.41	1.19	0.37	43.8	12.9	173	30.45	23.48	36.71		40	13.7							0	0	0	0	0	0	0	1	0
0	1	0	0	17	0	0	0	0	26.1286	42	2.71667	108.667	0.28	13.3333	139.35	12	8.15	3	0.84	51.1	14.9	40	11.09	14.17	32.99		8	3.3							1	0	1	1	0	1	0	0	1
0	1	0	0	10	0	0	0	0		78	2.31214	1063.58	0.283237	265.896	137.28	6.24	4	1.73	0.49	44.4	13.4	460	21.27	42.99	26.64	3581	67	149.16							0	0	0	0	0	0	0	0	0
0	0	0	0	15	0	0	0	1	23.0332	62	1.84211	241.316	0.355263	172.368	134.18	2.5	1.4	0.76	0.27	39.9	12.7	131	8.91	16.21	39.61	363	16	3.3							0	0	0	0	0	0	0	0	0
0	0	0	0	13	0	0	0	1	21.7555	41	7.80909	1593.05	0.7	185.455	133.14	10.48	8.59	1.1	0.77	39.8	13	204	18.46	21.16	38.23	153	60	63.7							1	0	1	1	0	1	0	0	1
0	1	1	0	29	1	0	0	0	36.1111	29	6.20915	1049.35	0.699346	110.458	131.07	12.6	9.5	1.53	1.07	53.1	15.5	169	70.37	36.37	35.7	141	32	8.36							1	0	0	0	0	0	0	0	0
0	1	0	0	10	0	0	0	0	20.3954	49	1.84956	347.717	0.176991	166.372	131.07	3.5	2.09	1.13	0.2	40.8	12.5	188	33.16	34	41.38	153	40	1.8							1	1	1	0	0	1	0	0	1
0	0	0	0	7	0	0	0	0		51	4.68224	1133.1	0.252336	226.168	126.93	6.37	5.01	1.07	0.27	54.4	20.3	242	11.17	19.2	38.55	310	28								1	0	1	1	0	1	0	0	1
0	0	1	0	7	0	0	0	0	20.2812	38	1.77122	573.875	0.391144	119.557	126.93	8.72	4.8	2.71	1.06	45.2	14.1	324	19.47	16.37	31.17	589	20	33.5							1	0	0	0	0	0	0	1	1
0	0	0	0	7	0	0	0	0	21.6441	24	1.78243	445.607	0.263598	104.603	125.89	7.4	4.26	2.39	0.63	41.7	13	250	14.85	18.36		56	3	3.3							1	0	0	0	0	0	0	0	0
0	0	0	0	15	1	0	0	0	24.6548	35	3.35526	493.224	0.539474	193.421	125.89	3.73	2.55	0.76	0.41	59.7	21.8	147	4.87	14.93	27.86	801	58	10.79							1	1	0	0	0	0	0	0	0
0	1	0	0	15	1	0	0	0	23.6128	70	3.54124	1104.87	0.221649	160.825	120.71	9.31	6.87	1.94	0.43	47.7	13.4	312	77.45	97.61		123	8	1.73							0	0	0	0	0	0	0	0	1
0	0	0	0	10	0	0	0	0	21.0772	78	1.84507	164.211	0.267606	125.352	120.71	2.38	1.31	0.71	0.19	45.4	12.9	89	8.21	22.59	22.85	864	64	6.01							1	0	0	0	0	0	0	1	1
0	1	1	1	7	1	1	0	0	22.4088	51	3.75	813.75	0.3125	169.531	119.67	6.54	4.8	1.28	0.4	47.5	14.6	217	35.9	29.75	38.64	210	34								0	0	0	0	0	0	0	1	0
0	1	0	0	10	0	0	0	0	27.6095	34	3.03419	846.538	0.239316	238.462	108.26	5.1	3.55	1.17	0.28	45.3	16.8	279	10.13	15	37.82	284	16	7.94							0	0	0	0	0	0	0	1	1
0	0	0	0	7	0	0	0	0	21.7555	31	2.24865	676.843	0.345946	162.703	104.11	6.96	4.16	1.85	0.64	50.9	16.7	301	11.06	15.46	35.99	129	51	3.07							0	0	0	0	0	0	0	1	1
0	0	0	0	9	0	0	0	0	19.2336	33	1.44397	378.319	0.193966	112.931	103.07	6.26	3.35	2.32	0.45	45.1	12.6	262	8.13	12.35	36.73	157	28	6.61							1	0	1	0	0	0	0	0	0
0	0	0	0	13	0	0	0	0	25.1532	22	3.82222	1364.53	0.207407	264.444	91.65	6.79	5.16	1.35	0.28	51.5	14.8	357	6.89	16.62	26.48	1509	3	0.3							1	0	0	0	0	1	0	0	0
0	0	0	0	8	0	1	0	0		29	1.8692	644.873	0.172996	145.57	87.49	7.26	4.43	2.37	0.41	44.1	14.2	345	3.66	14.46	26.29		54	42.65							0	0	0	0	0	0	0	0	1
0	0	0	0	4	0	0	0	0	21.2306	34	1.99219	400.43	0.367187	157.031	78.13	4.37	2.55	1.28	0.47	39	12.7	201	19.1	19.97	40.74		22	3.34							1	0	1	0	0	1	0	1	1
0	1	0	0	19	0	0	0	0	23.1473	37	5.28866	1168.79	0.360825	227.835	311.99	6.52	5.13	0.97	0.35	62.9	20.1	221	15.44	14.47	38.88	42	8	3.22							1	0	1	0	0	1	0	0	1
0	1	0	0	5	0	0	0	0		25	10.9158	2270.48	0.231579	218.947	243.15	11.6	10.37	0.95	0.22	37.6	11.7	208	12.76	15.86	37.44	114	18	16.03							1	0	1	0	0	0	0	0	0
0	0	1	0	7	1	0	0	0	24.974	51	3.89394	1799	0.242424	350	115.53	6.91	5.14	1.32	0.32	38.7	12	462	4.44	18.42	40.18	504	31	25.03							1	0	0	0	0	0	0	1	1
0	1	0	0	15	0	0	0	0	21.2183	63	1.17647	105.882	0.264706	88.2353	151.76	2.56	1.2	1.02	0.27	46.1	13.3	90	32.57	40.62	35.35	189	59	1.95							1	0	1	0	0	0	0	0	1
0	0	0	0	10	0	0	0	0	20.3223	23	2.53	508.53	0.23	201	129	3.87	2.53	1	0.23	40.1	12.9	201	9.58	18.73	37.4	150	25	3.3							1	1	0	0	0	0	0	0	0
0	0	0	0	4	0	0	0	0	20.5693	22	1.70335	415.617	0.172249	116.746	95.8	6.02	3.56	2.09	0.36	41.1	12.5	244	6.6	13.14			13	5.64							0	0	0	0	0	0	0	1	1
0	0	0	0	14	0	0	0	0		55	0.444444	48.4444	0.125	75.6944	168.28	3.7	0.64	1.44	0.18	51.1	15.3	109	64.74	96.5	25.85	407	70	3.03							1	0	0	0	0	1	0	1	1
0	1	1	0	15	0	0	0	0	23.8087	28	1.92166	484.258	0.387097	116.129	95.8	7.56	4.17	2.17	0.84	42.6	13	252	49.06	28.88	39.19	57	2	1.94							0	0	0	0	0	0	0	0	0
0	1	0	0	5	0	0	0	0	20.4467	37	1.34437	342.815	0.145695	168.874	129	3.78	2.03	1.51	0.22	43.8	13.5	255	11.93	17.01	37.34	819	66	26.73							1	0	1	0	0	0	0	1	1
0	0	0	0	9	0	0	0	0	26.7094	55	1.82787	573.951	0.180328	257.377	121.75	3.85	2.23	1.22	0.22	43.3	12.4	314	36.32	28.58	36.74	131	28	2.53							1	0	0	0	0	0	0	0	0
0	0	0	0	11	0	0	0	0		65	2.13669	728.612	0.208633	245.324	186.82	4.74	2.97	1.39	0.29	48.4	14.1	341	12.92	17.44	28.56	4160	24	13.51							1	0	0	0	0	0	0	1	1
0	0	1	0	22	0	0	0	0	19.6927	17	4.95694	1397.86	0.258373	134.928	105.15	13.07	10.36	2.09	0.54	38.1	12.2	282	11.36	16.27	48.93	610	2	3.46							0	0	0	0	0	0	0	0	0
0	1	0	0	15	0	0	0	0	24.8358	66	0.925651	196.238	0.200743	78.8104	230.91	5.78	2.49	2.69	0.54	51.8	13.9	212	22.37	23.64	38.58		23	24.5							0	0	0	0	0	0	0	1	1
0	0	0	0	8	0	0	0	0	18.6709	53	1.45378	264.588	0.117647	152.941	182.71	3.1	1.73	1.19	0.14	42.7	12.1	182	33.28	21.53	33.27	50	9	3.2							0	0	0	0	0	0	0	1	0
0	1	1	0	34	0	0	0	0		53	4.32704	558.189	0.308176	81.1321	309.96	8.97	6.88	1.59	0.49	57.3	17.4	129	57.71	44.35	39.06	107	10	12.1							1	0	0	0	0	0	0	0	1
0	1	0	0	8	0	0	0	0	20.7031	33	2.03774	171.17	0.330189	79.2453	91.65	3.64	2.16	1.06	0.35	54.4	16.3	84	7.81	16.36	32.99	231	22	3.22							1	0	1	0	0	1	0	0	1
0	0	0	0	9	0	0	0	0	22.5827	56	1.25275	280.615	0.214286	123.077	306.96	4.83	2.28	1.82	0.39	41.5	13.1	224	18.37	25.62	46.13	74	9	3.22							1	0	0	0	0	0	0	0	1
0	0	0	0	13	0	0	0	0	41.4016	32	2.26871	775.898	0.282313	116.327	186.82	11.09	6.67	2.94	0.83	42.4	13.6	342	78.96	39.08		132	22	5.23							1	0	0	0	0	0	0	0	0
0	1	0	0	9	0	0	0	0	21.2874	52	1.00467	171.799	0.242991	79.9065	158.99	4.98	2.15	2.14	0.52	53.1	16.8	171	11.21	19.09	35.31	135	12	3.22							0	0	0	0	0	0	0	0	1
0	1	0	0	7	0	0	0	0	23.7118	58	1.68047	315.929	0.130178	111.243	134.18	4.78	2.84	1.69	0.22	44.2	13.4	188	14.48	21.23	29.54		14	4.63							1	1	0	0	0	0	0	0	1
0	1	0	0	12	0	0	0	0	23.7118	29	2.49042	978.736	0.283525	150.575	102.03	9.99	6.5	2.61	0.74	49.3	14.6	393	88.97	99.96	39.24			5							0	0	0	0	0	0	0	0	0
0	0	0	0	4	0	0	0	1	21.1553	32	1.30568	390.397	0.28821	130.568	111.38	6.15	2.99	2.29	0.66	40.1	12.2	299	11.09	15.09	38.11	89	6	3.34							0	0	0	0	0	0	0	1	1
0	1	1	0	14	0	0	1	1	26.0276	17	5.9959	1097.25	0.532787	75	143.49	18.42	14.63	2.44	1.3	41.8	15.4	183	102.32	62.04	26.07	396	2	3.34							1	0	0	0	0	0	0	0	1
0	0	0	0	9	0	0	0	0	23.2335	31	1.4507	448.268	0.15493	145.07	113.45	5.65	3.09	2.13	0.33	42	12.5	309	13.12	13.76	41.43	57	4	3.34							0	0	0	0	0	0	0	0	0
0	0	0	0	19	0	0	0	0	26.0375	59	1.16746	50.201	0.23445	20.5742	188.88	5.29	2.44	2.09	0.49	37.7	12.6	43	21.38	21.79	41.76	1161	8	3.34							1	0	0	0	0	0	0	0	0
0	0	1	1	7	0	0	0	0	18.7305	67	3.34375	929.562	0.25	173.75	389.61	7.65	5.35	1.6	0.4	43.8	13.6	278	10.18	15.76	30.6	1576	72	78.7							0	0	0	0	0	0	0	1	1
0	0	1	0	11	0	0	0	0	15.7038	60	2.10185	111.398	0.194444	49.0741	577.87	3.58	2.27	1.08	0.21	93.2	20	53	21.6	32.57		374	50	15.25							0	0	0	0	0	0	0	1	1
0	0	1	1	11	1	0	0	1	25.8264	77	5.47458	2408.81	0.355932	372.881	210.44	8.11	6.46	1.18	0.42	42.3	12.3	440	71.93	34.06	32.77	784	62	18.2							1	0	0	0	0	0	0	1	1
0	0	0	0	20	0	0	0	0		43	6.73684	498.526	0.578947	389.474	586.19	1.58	1.28	0.19	0.11	58.7	17.4	74	66.86	354.44	22.2	1225	36	16.8							1	1	1	0	0	1	0	0	0
0	0	0	0	15	0	1	0	0	20.9321	49	1.22785	287.316	0.248945	98.7342	172.41	5.95	2.91	2.37	0.59	36.8	11.9	234	12.48	20.92	44.92		22	3.34							1	0	0	0	0	0	0	0	0
0	1	0	0	4	1	0	0	0	22.7615	47	7.21429	4934.57	0.459184	697.959	184.76	8.56	7.07	0.98	0.45	48.1	14.4	684	7.62	24.01	28.96			20.76							1	1	0	0	0	0	0	0	0
0	0	0	0	12	0	0	0	0	19.2894	19	1.78431	326.529	0.313725	358.824	164.15	1.59	0.91	0.51	0.16	37	11.4	183	22.98	19.54	29.11	611	70	5.73							1	1	1	1	0	1	0	0	0
0	1	0	0	16	0	0	0	0	23.4375	71	13.4455	5929.49	0.653465	436.634	210.44	15.29	13.58	1.01	0.66	45.8	13.1	441	19.52	13.33	28.54		68	104							0	0	0	0	0	0	0	0	0
0	0	0	0	8	0	0	0	0	22.8329	73	2	502	0.230769	160.897	92.68	5.36	3.12	1.56	0.36	43	13.1	251	13.33	18.1	37.27		18	3.34							1	0	0	0	0	0	0	1	1
0	0	0	0	15	0	0	0	0	18.5178	16	1.06173	211.284	0.444444	245.679	180.65	2.09	0.86	0.81	0.36	61.4	20.9	199	82.49	85.86	38.59	160	14	3.3							1	0	1	0	0	0	0	0	0
0	1	0	0	13	1	0	0	0	23.5304	61	3.8	661.2	0.509091	316.364	373.82	2.93	2.09	0.55	0.28	44.1	14.2	174			32.68	364	42	15.14							1	0	0	0	0	1	0	0	0
0	1	0	0	7	1	0	0	0	25.5588	57	1.49624	320.195	0.270677	160.902	496.19	3.73	1.99	1.33	0.36	44.6	13.3	214	12.92	18.88	37.28	84	17	3.3							1	0	1	1	0	1	0	0	0
0	1	0	0	9	0	0	0	0	15.5556	41	1.9881	598.417	0.392857	179.167	396.5	5.71	3.34	1.68	0.66	40	12.8	301	12.2	21.26	29.1	126	40	0.72							1	0	1	1	0	1	0	0	1
0	1	0	0	7	0	0	0	0	29.1749	41	2	338	0.263158	148.246	98.92	3.78	2.28	1.14	0.3	47.8	13.2	169	22.19	22.57	38.59	75	10	0.59							1	0	1	0	0	1	0	0	0
0	1	1	0	15	1	0	0	1	24.3911	29	2.81333	329.16	0.36	156	275.67	3.17	2.11	0.75	0.27	43.2	13.2	117	19.09	40.91	20.14	3056	22	3.61							1	1	1	0	0	0	0	1	1
0	1	0	0	7	1	0	0	0	24.6094	69	4.27273	965.636	0.373737	228.283	157.26	5.62	4.23	0.99	0.37	45.3	12	226	6.56	11	32.62	440	72	31.7							0	0	0	0	0	0	1	1	1
0	0	0	0	13	1	0	0	0	22.2137	55	2.3114	1060.93	0.320175	201.316	201.21	8.5	5.27	2.28	0.73	43.5	13.6	459	234.28	94.7	36.32		60	10.7							0	0	0	0	0	0	0	1	0
0	1	0	0	7	1	0	0	0	24.5578	57	3.31884	806.478	0.449275	176.087	197.1	6.64	4.58	1.38	0.62	47.5	13.8	243	21.39	25.26	36.62	55	4	3.34							1	0	1	1	0	1	0	0	0
0	1	0	0	7	1	0	0	0	24.5578	71	1.43827	355.253	0.283951	152.469	224.77	4.74	2.33	1.62	0.46	42	12.2	247	12.87	19.01	38.5	44	10	3.34							1	0	0	0	0	0	0	0	0
0	0	0	0	5	0	0	0	0	26.5625	52	1.34252	510.157	0.204724	149.606	150.73	6.71	3.41	2.54	0.52	43.8	17.3	380	12.49	21.09	42.97	42	8	3.34							0	0	0	0	0	1	0	1	1
0	0	0	0	9	1	1	0	0		60	4.48148	1425.11	0.395062	196.296	228.86	9.58	7.26	1.62	0.64	48.1	16.7	318	17.12	19.89	33.68	1675	50	21.7							0	0	0	0	0	0	0	1	1
0	1	0	0	20	1	1	0	0	22.2222	64	1.35811	252.608	0.391892	125.676	215.56	4.42	2.01	1.48	0.58	41.1	12.9	186	9.69	15.53	36.7	365	60	14.2							1	0	0	0	0	0	0	1	1
0	1	0	0	11	0	0	0	0	17.7778	68	1.51974	275.072	0.256579	119.079	192.99	4.36	2.31	1.52	0.39	50.9	14.9	181	13.44	23.25	36.33	109	8	3.34							1	0	0	0	0	1	0	0	0
0	0	1	1	4	0	0	0	0	23.1481	45	5.66667	1280.67	0.382353	221.569	206.34	7.21	5.78	1.02	0.39	41.8	11.8	226	13.81	16.62	35.84		14	4.86							0	0	0	0	0	0	0	0	0
0	0	0	0	8	1	0	0	0	26.079	47	3.73404	929.777	0.297872	132.447	244.17	9.55	7.02	1.88	0.56	40.6	12.2	249	12.23	14.47	36.7		56	144.42							0	0	0	0	0	0	0	1	1
0	0	1	0	16	0	0	0	0	24.8356	27	7.65863	4304.15	0.417671	225.703	151.76	23.23	19.07	2.49	1.04	43.2	12.5	562	45.43	24.66	33.27		74	144							0	0	0	0	0	0	0	0	0
0	1	0	0	9	0	0	0	0	21.4876	79	4.23684	627.053	0.45614	129.825	273.64	6.52	4.83	1.14	0.52	52.3	15.5	148	37.09	33.33	39.04	1224	62	177.54							1	0	0	0	0	0	0	1	1
0	0	0	0	7	0	0	0	0	24.7475	53	3.73077	1149.08	0.160256	197.436	238.05	7.65	5.82	1.56	0.25	55.9	14.8	308	18.85	38.08	43.1	283	70	4.73							0	0	0	0	0	0	0	1	1
0	0	0	0	8	0	0	0	0	21.6441	38	0.981132	69.6604	0.216981	66.9811	338.04	2.43	1.04	1.06	0.23	50.7	14.1	71	31.38	45.2	39.05	100	32	0.48							1	0	1	1	0	1	0	0	1
0	0	0	0	9	0	0	0	0	19.052	52	1.625	578.5	0.160714	317.857	179.62	3.19	1.82	1.12	0.18	42.5	12.7	356	14.22	14.95	31.61		60	12.95							1	0	0	0	0	0	0	1	1
0	1	0	0	6	1	0	0	0	29.4758	53	1.47899	349.042	0.361345	198.319	294.87	3.49	1.76	1.19	0.43	47.8	13.2	236	12.57	17.36	35.41	1171	24	24.5							1	0	0	0	0	0	0	0	0
0	1	0	0	14	1	0	0	0	20.9566	60	0.934426	57.9344	0.221311	50.8197	182.71	2.66	1.14	1.22	0.27	56.8	13.2	62	19.62	14.52	33.94		115	13.5							0	0	0	0	0	0	0	0	0
0	1	0	0	7	0	0	0	0	20.9366	47	2.12308	335.446	0.346154	121.538	161.06	4.59	2.76	1.3	0.45	44.6	13.1	158	9.22	16.11	38.15	68	20	3.22							0	0	0	0	0	0	0	1	1
0	0	0	1	9	0	0	0	0	24.7676	48	1.31624	109.248	0.17094	70.9402	189.91	2.96	1.54	1.17	0.2	46.2	15.5	83	39.87	32.12	39.54	157	14	3.22							1	0	1	1	0	1	0	0	1
0	1	1	0	14	0	1	0	0	21.6713	76	1.59286	363.171	0.325	81.4286	244.17	8.98	4.46	2.8	0.91	53.8	15.3	228	8.14	12.21	31.58	1005	12	36.76							0	0	0	0	0	0	0	0	0
0	0	0	0	12	0	0	0	0	20.7612	62	2.19298	578.947	0.421053	231.579	189.91	4.28	2.5	1.14	0.48	44.6	14.9	264	14.21	16.27	34.6	199		13.57							1	0	1	1	0	1	0	0	0
0	1	0	0	6	0	0	0	0	20.7008	41	0.791667	163.875	0.234375	107.812	201.21	3.94	1.52	1.92	0.45	46.8	13.7	207	10.59	15.99	32.48		8	3.22							1	1	1	0	0	1	0	0	0
0	1	1	0	8	1	0	0	0	26.0375	78	3.5817	856.026	0.27451	156.209	157.96	7.56	5.48	1.53	0.42	47.3	14	239	10.9	17.29	30.23	591		105.77							0	0	0	0	0	0	0	0	0
0	1	0	0	8	0	0	0	0	20.7008	50	1.7716	384.438	0.111111	133.951	127.96	4.87	2.87	1.62	0.18	44.2	14.3	217	13.33	20.74	34.91	122	25	18.4							1	0	0	0	0	0	0	1	1
0	1	0	0	9	0	0	0	0	35.5469	30	2.88043	1532.39	0.103261	289.13	122.78	7.46	5.3	1.84	0.19	42.6	12.1	532	7.99	14.35	33.29		34	56.5							0	0	0	0	0	0	0	1	1
0	0	0	0	9	0	0	0	0	26.9531	33	2.10356	420.712	0.165049	64.7249	107.22	10.17	6.5	3.09	0.51	52.3	14.7	200	105.99	92.59			4	3.32							0	0	0	0	0	0	0	0	0
0	1	1	0	10	0	0	0	0	27.1706	36	2.91636	1589.42	0.443636	198.182	139.35	12.46	8.02	2.75	1.22	38	11.7	545	26.49	19.64	35.57	145	60	49.2							1	0	0	0	0	0	0	0	0

## Sheet: medicine(Treated group)
糖皮质激素（ GC）	免疫抑制剂环磷酰胺 cyclophosphamide (CYC)	吗替麦考酚酯霉酸酚酯（mycophenolate mofetil ）MMF	硫酸羟氯喹Hydroxychloroquine（HCQ）	免疫抑制剂来氟米特(LEF)	免疫抑制剂甲氨蝶呤Methotrexate MTX	雷公藤tripterygium wilfordii Hook F (TWHF)	生物制剂(Biological Agents)	非甾体类抗炎药（MSAIDS）	钙调节剂(CNIS)	疾病诊断(1=ILD;0=no-ILD)
1	1	1	0	0	0	0	0	0	0	1
1	1	0	0	0	0	1	0	0	0	1
1	0	0	0	0	1	1	0	0	0	1
1	0	0	0	0	0	1	0	0	0	1
1	0	0	0	0	0	0	0	0	0	1
1	0	0	0	0	0	0	0	0	0	1
1	1	0	0	0	0	0	0	0	0	1
1	0	0	0	0	0	0	0	0	0	1
0	0	0	0	0	0	1	0	1	0	1
1	0	0	0	0	0	0	0	0	0	1
0	0	0	1	0	0	0	0	0	0	1
1	0	0	0	0	0	0	0	0	0	1
1	1	0	0	0	0	1	0	0	0	1
0	0	0	1	1	0	0	0	0	0	1
1	1	0	0	0	0	0	0	0	0	1
1	1	0	0	0	0	0	0	0	0	1
0	0	0	1	1	1	1	0	0	0	1
1	0	0	0	0	0	0	0	0	0	1
1	0	0	0	0	0	0	0	0	0	1
1	0	0	0	0	0	0	0	0	0	1
1	0	0	0	0	0	1	0	0	0	1
1	0	0	0	0	1	0	0	1	0	1
1	0	0	0	0	0	0	0	0	0	1
1	0	0	0	0	0	0	0	0	0	1
1	0	0	1	0	0	0	0	0	0	1
1	0	1	0	0	0	0	0	0	0	1
1	0	1	1	0	0	1	0	0	0	1
0	1	0	1	0	0	0	0	0	0	1
1	0	0	0	0	0	0	0	0	0	1
1	0	0	0	0	0	0	0	0	0	1
1	0	0	0	1	0	1	1	0	0	1
1	0	0	1	0	0	0	0	0	0	1
1	0	0	0	0	0	0	0	0	0	1
0	0	0	0	0	0	0	0	0	0	1
0	0	0	0	0	0	1	0	1	0	1
1	0	0	0	0	1	0	0	0	0	1
1	1	0	0	0	0	0	0	0	0	1
1	0	0	0	1	0	0	0	1	0	1
1	0	1	0	0	0	0	0	0	0	1
1	0	0	0	1	1	0	0	0	0	1
1	0	1	1	0	0	0	0	0	0	1
0	0	0	0	1	1	0	0	0	0	1
1	0	0	0	0	1	0	0	0	1	1
1	0	1	0	0	0	0	0	0	0	1
0	0	0	0	0	0	0	0	1	0	0
1	0	0	0	0	0	0	0	0	1	0
1	0	0	1	0	0	0	0	0	0	0
0	0	0	0	0	0	0	0	0	0	0
1	0	0	0	1	0	0	0	0	0	0
1	0	0	0	0	0	0	0	0	0	0
0	0	0	0	0	0	0	0	0	0	0
0	0	0	0	0	0	0	0	0	0	0
1	0	1	1	0	0	0	0	0	0	0
0	0	0	0	0	0	0	0	0	0	0
1	0	0	1	0	0	0	0	0	0	0
1	0	0	1	0	0	0	0	0	0	0
1	1	0	0	0	0	0	0	0	0	0
1	0	0	0	0	0	0	0	1	0	0
1	0	1	0	1	0	0	1	0	0	0
0	0	0	1	0	0	0	0	0	0	0
1	0	1	0	0	1	0	0	0	0	0
1	0	0	0	0	0	0	0	0	0	0
1	0	0	0	0	0	1	0	0	0	0
1	0	1	1	0	0	0	0	0	1	0
1	0	1	0	0	0	0	0	0	0	0
1	1	1	0	0	0	0	1	0	0	0
0	0	0	0	0	0	0	0	0	0	0
1	1	0	0	1	0	0	0	0	0	0
1	0	0	0	0	0	1	0	0	1	0
1	0	0	0	1	0	0	0	0	0	0
0	0	0	0	0	0	0	0	0	0	0
0	0	0	0	1	0	0	0	1	0	0
0	0	0	0	0	1	0	0	1	0	0
1	0	0	0	0	0	0	0	0	0	0
1	0	0	0	0	1	1	0	1	0	0
1	0	0	1	0	0	1	0	0	0	0
1	0	0	1	0	0	0	0	0	0	0
1	0	0	0	0	0	0	0	0	0	0
0	0	0	0	0	1	0	0	0	0	0
0	0	0	0	0	1	0	0	0	0	0
1	0	0	1	0	0	0	0	0	0	0
0	0	1	1	0	0	0	0	0	0	0
0	0	0	0	0	0	0	0	0	0	0
0	0	0	0	0	0	1	0	0	0	0
0	0	0	0	1	1	0	1	1	0	0
1	0	0	0	0	1	0	0	0	0	0
1	0	0	1	1	0	0	0	0	0	0
1	0	1	1	0	0	1	0	0	0	0
1	0	0	0	0	1	0	0	0	0	0
1	1	0	1	0	0	0	0	0	0	0
1	0	1	0	0	1	0	0	0	0	0
1	0	0	0	0	0	0	0	0	0	0
1	0	1	1	0	0	0	0	0	0	0
1	1	0	0	0	0	0	0	0	0	0
1	1	0	1	0	0	0	0	0	0	0
1	0	1	0	0	0	0	0	0	0	0
0	0	0	1	0	0	0	0	0	0	0
1	0	0	1	1	0	0	0	0	0	0
0	0	0	0	0	0	0	0	0	0	0
1	1	0	0	0	0	1	0	0	0	0
0	1	0	0	0	0	0	0	0	0	0
0	0	1	0	1	0	0	0	0	0	0
0	0	0	0	0	0	1	1	0	0	0
1	0	0	0	1	0	0	0	0	0	0
1	0	0	0	1	0	0	0	0	0	0
1	0	0	1	0	0	0	0	0	0	0
1	0	0	0	0	0	0	0	0	1	0
0	0	0	0	0	0	0	0	1	0	0
1	0	0	0	1	1	0	0	0	0	0
1	0	0	1	0	0	0	0	0	0	0
1	0	0	0	0	0	0	0	0	0	0
1	0	0	0	1	1	0	0	0	0	0
1	0	0	0	0	0	0	0	0	0	0
1	1	1	1	0	0	0	0	0	0	0

## Sheet: evolution time
evolution time	group
2	1
1	1
0.75	1
22	1
2	1
1	1
3	1
0.5	1
0.25	1
0.6	1
4	1
0.5	1
0.33	1
0.08	1
0.83	1
0.25	1
0.5	1
2	1
3	1
0.16	1
0.5	1
0.5	1
0.5	1
2	1
4	1
0.5	1
3	1
2	1
2	1
3	1
0.58	1
16	1
1.5	1
10	1
10	1
0.5	1
3	1
3	1
3	1
1	1
12	1
5	1
0.08	1
3	1
2	1
3	1
1	1
9	1
10	1
2	1
1	1
4	1
6	1
3	1
3	1
1	1
7	1
10	1
5	1
2	1
4	1
5	1
5	1
0.17	1
3	1
0.25	1
8	1
10	1
0.5	1
2	1
0.17	1
20	1
0.83	1
6	1
6	1
16	1
4	1
10	1
3	1
3	1
10	1
0.25	1
6	1
10	1
2	1
0.08	0
0.25	0
2	0
3	0
4	0
0.04	0
1	0
10	0
20	0
0.08	0
10	0
1	0
0.17	0
0.75	0
0.17	0
9	0
0.25	0
5	0
6	0
10	0
1	0
20	0
0.17	0
8	0
8	0
35	0
30	0
0.08	0
2	0
1	0
5	0
0.17	0
8	0
0.08	0
16	0
2	0
5	0
1.33	0
0.08	0
3	0
0.25	0
0.5	0
3	0
1	0
0.42	0
30	0
16	0
4.33	0
1	0
7	0
4	0
20	0
6	0
2	0
8	0
8	0
0.5	0
2	0
5	0
0.17	0
5	0
10	0
10	0
10	0
5	0
10	0
6	0
8	0
0.08	0
8	0
0.08	0
8	0
0.08	0
0.25	0
7	0
6	0
10	0
3	0
2.5	0
6	0
1	0
11	0
1	0
16	0
0.08	0
0.67	0
0.08	0
14	0
5	0
4	0
0.25	0
7	0
1	0
12	0
2	0
0.08	0
0.75	0
0.17	0
1	0
2	0
0.42	0
0.58	0
0.08	0
7	0
0.5	0
1.5	0
0.5	0
2	0
0.25	0
1.67	0
0.5	0
14	0
1.5	0
1.5	0
0.58	0
11	0
6	0
5	0
10	0
2	0
9	0
0.16	0
0.16	0
0.5	0
20	0
12	0
2	0
1	0
18	0
3	0
11	0
13	0
5	0
6	0
5	0
20	0
22	0
4	0
3	0
3	0

## Sheet: different types CTD-ILD
CTD Typle(1=RA; 2=PM/DM;3=SSc;4=Sjs;5=other CTD)	有无用药（Medication）	疾病诊断(1=ILD; 0=no-ILD)	NLR	SII	MLR	PLR	KL-6
1	1	1	3.49662	898.632	0.503378	86.8243	1846.58
1	1	1	2.1828	691.946	0.209677	170.43	3886.63
1	1	1	7.62308	1318.79	0.4	133.077	1702.53
1	0	1	1.3384	191.392	0.277567	54.3726	1533.07
1	0	1	2.13295	684.676	0.208092	185.549	962.07
1	0	1	9.11392	3472.41	0.56962	482.278	855.39
1	1	1	9.16883	1962.13	0.207792	277.922	840.02
1	1	1	5.61878	2343.03	0.535912	230.387	796.99
1	1	1	8.2561	677	0.97561	100	696.86
1	1	1	3.07004	749.089	0.330739	94.9416	618.34
1	1	1	2.64885	331.107	0.221374	95.4198	532.15
1	1	1	4.05028	1271.79	0.268156	175.419	261.47
1	1	1	0.855895	179.738	0.161572	91.7031	877.47
1	1	1	13.0541	4647.24	0.527027	481.081	2479.98
1	1	1	2.08088	518.14	0.25	183.088	357.96
1	0	1	4.26203	1466.14	0.529412	183.957	713.75
1	0	1	1.68966	371.724	0.203448	75.8621	791.8
1	0	1	1.93827	325.63	0.339506	103.704	3283.23
1	1	1	5.04396	1260.99	0.417582	274.725	2579.93
1	0	1	8.95	1387.25	0.3625	193.75	1909.53
1	0	1	3.352	724.032	0.48	172.8	1877.37
1	1	1	3.95726	597.547	0.307692	129.06	291.85
1	1	1	14.8615	5038.06	2.16923	521.538	230.91
1	1	1	2.11538	440	0.490385	200	406.32
1	1	1	3.7619	1057.1	0.517007	191.156	318.02
1	0	1	3.82581	1415.55	0.554839	238.71	202.23
5	1	1	56.1071	12848.5	0.857143	817.857	562.09
5	0	1	1.4186	348.977	0.169435	81.7276	1107.82
5	0	1	1.45455	170.182	0.469697	177.273	663.7
5	1	1	0.774691	184.377	0.138889	73.4568	246.21
2	1	1	2.79798	945.717	0.318182	170.707	886.78
2	0	1	7.39	1640.58	0.88	222	1529.08
2	1	1	2.61224	394.449	0.442177	102.721	1442.78
2	1	1	4.27966	1091.31	0.144068	216.102	4224.5
2	0	1	7.71429	1087.71	0.642857	335.714	1205.44
2	1	1	1.37419	254.226	0.212903	59.6774	1112.62
2	1	1	4.86076	908.962	0.721519	118.354	920.42
2	1	1	3.17895	874.211	0.226316	144.737	740.26
2	1	1	1.15466	318.686	0.148305	58.4746	502.85
2	0	1	1.47099	314.792	0.368601	73.0375	238.05
2	0	1	2.22277	662.386	0.316832	147.525	885.09
2	1	1	2.59223	487.34	0.485437	182.524	267.56
3	1	1	1.29231	254.585	0.230769	101.026	5499.54
3	1	1	3.69903	580.748	0.368932	152.427	1469.42
3	0	1	3.40367	1164.06	0.40367	313.761	1276.61
3	0	1	3.13043	1324.17	0.288043	229.891	1198.36
3	1	1	2.68261	536.522	0.369565	86.9565	1093.37
3	1	1	2.22857	425.657	0.271429	136.429	138.32
3	1	1	2.35573	727.921	0.237154	122.134	462.68
3	0	1	2.39091	729.227	0.668182	138.636	719.07
4	0	1	7.49153	5026.81	0.581921	379.096	3297.38
4	0	1	1.81215	494.718	0.232044	150.829	1994.84
4	0	1	2.89024	601.171	0.384146	126.829	865.6
4	1	1	3.85143	658.594	0.16	97.7143	419.03
4	0	1	5.91429	650.571	0.52381	104.762	956.26
4	0	1	4.77348	2033.5	0.569061	235.359	3235.96
4	1	1	4.37681	630.261	0.405797	208.696	1624.38
4	1	1	6.12903	845.806	0.354839	222.581	237.03
4	0	1	1.49618	311.206	0.167939	158.779	256.39
4	0	1	1.70968	239.355	0.232258	90.3226	176.53
4	0	1	1.40645	210.968	0.2	96.7742	290.84
5	1	1	5.29703	1165.35	0.108911	217.822	4854.06
5	1	1	3.20652	808.043	1.09783	273.913	1281.28
5	0	1	1.78723	325.277	0.287234	193.617	1261.82
5	0	1	5.08081	701.152	0.757576	139.394	2296.7
5	0	1	2.80132	479.026	0.324503	113.245	1902.17
5	0	1	6.38346	2195.91	0.466165	258.647	1678.51
5	1	1	17.28	3732.48	0.973333	288	1524.79
5	0	1	2.04717	286.604	0.207547	132.075	1261.82
5	0	1	1.19437	263.957	0.130435	56.5217	138.32
5	0	1	1.11111	323.333	0.126437	111.494	576.02
5	0	1	11.3922	398.725	0.627451	68.6275	432.68
5	1	1	3.75362	1336.29	0.485507	257.971	1003.28
5	0	1	2.41509	623.094	0.176101	162.264	973.65
5	1	1	5.30769	1863	0.646154	540	851.13
5	1	1	4.38542	855.156	0.447917	203.125	909.52
5	1	1	10.5342	2412.34	0.616438	313.699	177.56
5	1	1	6.29412	270.647	0.735294	126.471	212.49
5	0	1	2.10651	303.337	0.272189	85.2071	445.29
5	1	1	6.87234	1381.34	0.404255	213.83	592.65
5	0	1	7.43956	2708	0.538462	400	431.7
5	0	1	3.5814	537.209	0.0232558	174.419	1588.99
5	0	1	0.801802	190.027	0.225225	106.757	132.11
5	0	1	8.76471	2454.12	1.06863	274.51	1123.02
5	0	1	12.25	379.75	1.01471	45.5882	333.66
1	1	0	26.7037	4593.04	0.518519	637.037	142.46
1	1	0	5.52381	1524.57	0.657143	262.857	264.51
1	1	0	4.14516	878.774	0.677419	170.968	320.02
1	1	0	5.69536	1611.79	0.125828	187.417	192.99
1	0	0	2.06278	569.327	0.26009	123.767	157.96
1	0	0	2.66667	1176	0.217687	300	156.93
1	1	0	1.46457	391.039	0.259843	210.236	154.86
1	0	0	1.98319	293.513	0.277311	124.37	148.66
1	1	0	3.44248	808.982	0.389381	207.965	146.59
1	1	0	2.91089	753.921	0.425743	256.436	143.49
1	1	0	2.86555	495.739	0.310924	145.378	142.46
1	1	0	2.31214	1063.58	0.283237	265.896	137.28
1	0	0	1.77122	573.875	0.391144	119.557	126.93
1	1	0	3.75	813.75	0.3125	169.531	119.67
1	1	0	3.03419	846.538	0.239316	238.462	108.26
1	0	0	2.24865	676.843	0.345946	162.703	104.11
1	0	0	1.44397	378.319	0.193966	112.931	103.07
1	0	0	1.8692	644.873	0.172996	145.57	87.49
1	0	0	3.89394	1799	0.242424	350	115.53
1	0	0	1.70335	415.617	0.172249	116.746	95.8
1	1	0	1.34437	342.815	0.145695	168.874	129
1	0	0	2.13669	728.612	0.208633	245.324	186.82
1	1	0	0.925651	196.238	0.200743	78.8104	230.91
1	0	0	1.45378	264.588	0.117647	152.941	182.71
1	0	0	1.30568	390.397	0.28821	130.568	111.38
1	0	0	3.34375	929.562	0.25	173.75	389.61
1	0	0	2.10185	111.398	0.194444	49.0741	577.87
1	0	0	5.47458	2408.81	0.355932	372.881	210.44
1	0	0	2	502	0.230769	160.897	92.68
1	0	0	2.3114	1060.93	0.320175	201.316	201.21
1	0	0	1.34252	510.157	0.204724	149.606	150.73
1	0	0	4.48148	1425.11	0.395062	196.296	228.86
1	1	0	1.35811	252.608	0.391892	125.676	215.56
1	0	0	5.66667	1280.67	0.382353	221.569	206.34
1	0	0	3.73404	929.777	0.297872	132.447	244.17
1	1	0	4.23684	627.053	0.45614	129.825	273.64
1	0	0	3.73077	1149.08	0.160256	197.436	238.05
1	0	0	1.625	578.5	0.160714	317.857	179.62
1	1	0	2.12308	335.446	0.346154	121.538	161.06
1	1	0	1.59286	363.171	0.325	81.4286	244.17
1	1	0	3.5817	856.026	0.27451	156.209	157.96
1	1	0	2.88043	1532.39	0.103261	289.13	122.78
5	0	0	2.66667	781.333	0.319444	406.944	464.6
5	1	0	3.97368	731.158	0.201754	161.404	420.01
5	0	0	4.02752	845.78	0.302752	192.661	309.98
5	1	0	4.97931	1015.78	0.503448	140.69	286.8
5	1	0	2.05046	543.372	0.302752	121.56	276.68
5	0	0	1.27273	170.545	0.151515	203.03	249.26
5	0	0	3.12791	509.849	0.383721	189.535	242.13
5	1	0	1.38889	358.333	0.246914	159.259	236.01
5	1	0	5.40385	1437.42	0.557692	511.538	217.61
5	1	0	1.96212	472.871	0.219697	182.576	209.42
5	1	0	3.38393	741.08	0.392857	195.536	206.34
5	0	0	3.3301	549.466	0.485437	160.194	202.23
5	1	0	1.77741	319.934	0.242525	59.8007	190.93
5	0	0	3.375	388.125	0.3375	143.75	163.12
5	0	0	0.84507	32.1127	0.0915493	26.7606	163.12
5	1	0	5.12987	1097.79	0.441558	277.922	155.9
5	1	0	1.09202	219.497	0.226994	123.313	152.8
5	1	0	2.43523	801.192	0.19171	170.466	151.76
5	1	0	6.20915	1049.35	0.699346	110.458	131.07
5	1	0	1.84956	347.717	0.176991	166.372	131.07
5	0	0	3.35526	493.224	0.539474	193.421	125.89
5	0	0	3.82222	1364.53	0.207407	264.444	91.65
5	1	0	10.9158	2270.48	0.231579	218.947	243.15
5	0	0	2.53	508.53	0.23	201	129
5	1	0	2.03774	171.17	0.330189	79.2453	91.65
5	1	0	5.9959	1097.25	0.532787	75	143.49
5	0	0	6.73684	498.526	0.578947	389.474	586.19
5	1	0	7.21429	4934.57	0.459184	697.959	184.76
5	0	0	1.78431	326.529	0.313725	358.824	164.15
5	1	0	2.81333	329.16	0.36	156	275.67
5	1	0	0.791667	163.875	0.234375	107.812	201.21
2	1	0	1.49587	281.223	0.330579	155.372	204.29
2	0	0	1.78243	445.607	0.263598	104.603	125.89
2	1	0	3.54124	1104.87	0.221649	160.825	120.71
2	1	0	2.49042	978.736	0.283525	150.575	102.03
2	0	0	1.16746	50.201	0.23445	20.5742	188.88
2	0	0	2.10356	420.712	0.165049	64.7249	107.22
4	0	0	1.98246	404.421	0.438596	357.895	544.35
4	1	0	7.625	38.125	0.642857	8.92857	293.87
4	1	0	1.45699	412.328	0.22043	152.151	253.34
4	0	0	1.40164	217.254	0.327869	127.049	233.97
4	1	0	4.88462	923.192	0.179487	242.308	215.56
4	0	0	0.744681	153.404	0.205674	146.099	206.34
4	1	0	1.51724	31.8621	0.62069	24.1379	204.29
4	0	0	1.03004	291.502	0.218884	121.459	200.18
4	0	0	0.582278	120.532	0.259494	131.013	194.02
4	0	0	1.45638	202.436	0.355705	93.2886	190.93
4	1	0	10.5625	1774.5	0.90625	525	188.88
4	0	0	1.35172	258.179	0.275862	131.724	183.73
4	0	0	1	184	0.181373	90.1961	158.99
4	0	0	1.87069	338.595	0.267241	156.034	156.93
4	1	0	2.31081	330.446	0.189189	193.243	151.76
4	1	0	2.71667	108.667	0.28	13.3333	139.35
4	0	0	4.68224	1133.1	0.252336	226.168	126.93
4	1	0	5.28866	1168.79	0.360825	227.835	311.99
4	1	0	1.17647	105.882	0.264706	88.2353	151.76
4	0	0	1.22785	287.316	0.248945	98.7342	172.41
4	1	0	1.9881	598.417	0.392857	179.167	396.5
4	1	0	1.43827	355.253	0.283951	152.469	224.77
4	1	0	1.51974	275.072	0.256579	119.079	192.99
4	1	0	0.934426	57.9344	0.221311	50.8197	182.71
4	0	0	2.19298	578.947	0.421053	231.579	189.91
5	0	0	1.09548	266.201	0.211055	122.111	192.99
5	0	0	1.82787	573.951	0.180328	257.377	121.75
5	0	0	1.25275	280.615	0.214286	123.077	306.96
5	0	0	0.444444	48.4444	0.125	75.6944	168.28
5	1	0	4.32704	558.189	0.308176	81.1321	309.96
5	1	0	1.00467	171.799	0.242991	79.9065	158.99
5	1	0	1.68047	315.929	0.130178	111.243	134.18
5	1	0	3.8	661.2	0.509091	316.364	373.82
5	1	0	1.49624	320.195	0.270677	160.902	496.19
5	0	0	1.06173	211.284	0.444444	245.679	180.65
5	1	0	2	338	0.263158	148.246	98.92
5	0	0	0.981132	69.6604	0.216981	66.9811	338.04
5	1	0	1.7716	384.438	0.111111	133.951	127.96
5	1	0	3.26549	744.531	0.504425	201.77	290.84
5	0	0	2.50314	523.157	0.163522	131.447	161.06
5	0	0	1.24581	125.827	0.156425	56.4246	154.86
5	0	0	1.84507	164.211	0.267606	125.352	120.71
5	0	0	1.99219	400.43	0.367187	157.031	78.13
5	0	0	4.44231	1617	0.211538	700	255.37
5	1	0	9.94737	1770.63	0.263158	468.421	215.56
5	0	0	0.971014	65.058	0.130435	48.5507	164.15
5	1	0	3.31884	806.478	0.449275	176.087	197.1
5	0	0	1.31624	109.248	0.17094	70.9402	189.91
5	1	0	6.76471	196.176	0.607843	56.8627	323.03
5	0	0	7.80909	1593.05	0.7	185.455	133.14
5	1	0	1.47899	349.042	0.361345	198.319	294.87
5	0	0	2.26871	775.898	0.282313	116.327	186.82
5	0	0	5.28125	1394.25	0.1875	412.5	305.96
5	0	0	1.84211	241.316	0.355263	172.368	134.18
5	1	0	1.92166	484.258	0.387097	116.129	95.8
5	0	0	4.95694	1397.86	0.258373	134.928	105.15
5	0	0	1.4507	448.268	0.15493	145.07	113.45
5	1	0	13.4455	5929.49	0.653465	436.634	210.44
5	1	0	4.27273	965.636	0.373737	228.283	157.26
5	0	0	7.65863	4304.15	0.417671	225.703	151.76
5	1	0	2.91636	1589.42	0.443636	198.182	139.35
